# Supplementary material for: Efficacy of Alum-Adjuvanted Peptide and Carbohydrate Conjugate Vaccine Candidates against Group A Streptococcus Pharyngeal Infection in a Non-Human Primate Model
Source: MDPI journal article supplement (doi:10.3390/vaccines12040382), 2024-04-04
Supplement: s1 [file s1]

## Supplementary information

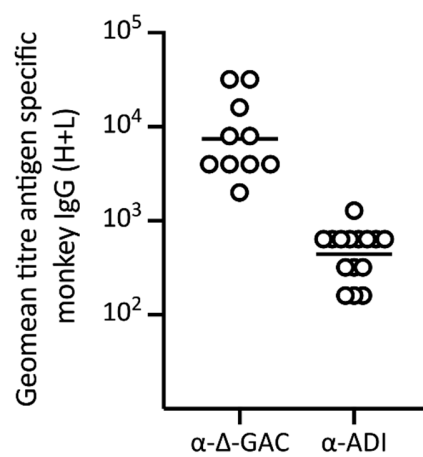

Supplementary figure S1. Anti- $\Delta$ GAC and anti-ADI antibodies in naïve NHP serum samples. Levels of anti- $\Delta$ GAC IgG antibodies in serum samples from naïve NHPs were from 1 to 2-log higher than baseline antibodies for protein antigens, such as ADI.

**Supplementary table S1.** Colonisation scoring system (Dunne, 2013).

| Colonisation                                                                                                                | Score |
|-----------------------------------------------------------------------------------------------------------------------------|-------|
| No $\beta$ -haemolytic colonies                                                                                             | 0     |
| <10 $\beta$ -haemolytic colonies in 1 <sup>st</sup> plate quadrant                                                          | 1     |
| >10 $\beta$ -haemolytic colonies in 1 <sup>st</sup> plate quadrant                                                          | 2     |
| >10 $\beta$ -haemolytic colonies in 1 <sup>st</sup> and 2 <sup>nd</sup> plate quadrants                                     | 3     |
| >10 $\beta$ -haemolytic colonies in 1 <sup>st</sup> , 2 <sup>nd</sup> and 3 <sup>rd</sup> plate quadrants                   | 4     |
| >10 $\beta$ -haemolytic colonies in 1 <sup>st</sup> , 2 <sup>nd</sup> , 3 <sup>rd</sup> and 4 <sup>th</sup> plate quadrants | 5     |

Dunne, E.M., J.L. Marshall, C.A. Baker, J. Manning, G. Gonis, M.H. Danchin, P.R.

Smeesters, C. Satzke & A.C. Steer, (2013) Detection of group a streptococcal pharyngitis by quantitative PCR. BMC Infectious Diseases 13: 312.

**Supplementary table S2.** Pharyngitis and tonsillitis signs scoring system (Skinner, 2011).

| Pharyngitis                                                       | Tonsillitis                                                                      | Score |
|-------------------------------------------------------------------|----------------------------------------------------------------------------------|-------|
| Normal                                                            | Normal tonsillar and oropharyngeal space                                         | 0     |
| Mild erythema with hyperemic blood vessels                        | Approximate 25% increase in tonsil size; 0-25% occlusion of oropharyngeal space  | 1     |
| More intense erythema and palatal petechiae                       | Approximate 50% increase in tonsil size; 25-50% occlusion of oropharyngeal space | 2     |
| Intense erythema with palatal petechiae and exudative tonsillitis | Approximate 75% increase in tonsil size; 50-75% occlusion of oropharyngeal space | 3     |

Skinner, J.M., I.C. Caro-Aguilar, A.M. Payne, L. Indrawati, J. Fontenot & J.H. Heinrichs,  
(2011) Comparison of rhesus and cynomolgus macaques in a *Streptococcus*  
*pyogenes* infection model for vaccine evaluation. Microbial pathogenesis 50: 39-47.
